# Supplementary material for: Poly(2-methoxyethyl acrylate)-grafted microfiltration membranes exhibiting low-fouling properties in the presence of salt species
Source: Royal Society of Chemistry journal article supplement (doi:10.1039/d4lf00129j), 2024-01-01
Supplement: d4lf00129j1.pdf [file d4lf00129j1.pdf]

## Supplementary Information

### **Poly(2-methoxyethyl acrylate)-grafted microfiltration membranes exhibiting low-fouling properties in the presence of salt species**

Kazuki Akamatsu<sup>1,\*</sup>, Masamune Sano<sup>1</sup>, Fumio Okada<sup>1</sup>, Shin-ichi Nakao<sup>1</sup>, Xiao-lin Wang<sup>1,2</sup>

<sup>1</sup> Department of Environmental Chemistry and Chemical Engineering, School of Advanced Engineering, Kogakuin University, 2665-1 Nakano-machi, Hachioji-shi, Tokyo 192-0015, Japan

<sup>2</sup> Department of Chemical Engineering, Tsinghua University, Beijing 100084, People's Republic of China.

#### **\*Corresponding author**

Kazuki Akamatsu

E-mail: [akamatsu@cc.kogakuin.ac.jp](mailto:akamatsu@cc.kogakuin.ac.jp)

Tel: +81-42-628-4584, Fax: +81-42-628-4542

<http://orcid.org/0000-0002-2865-1580>

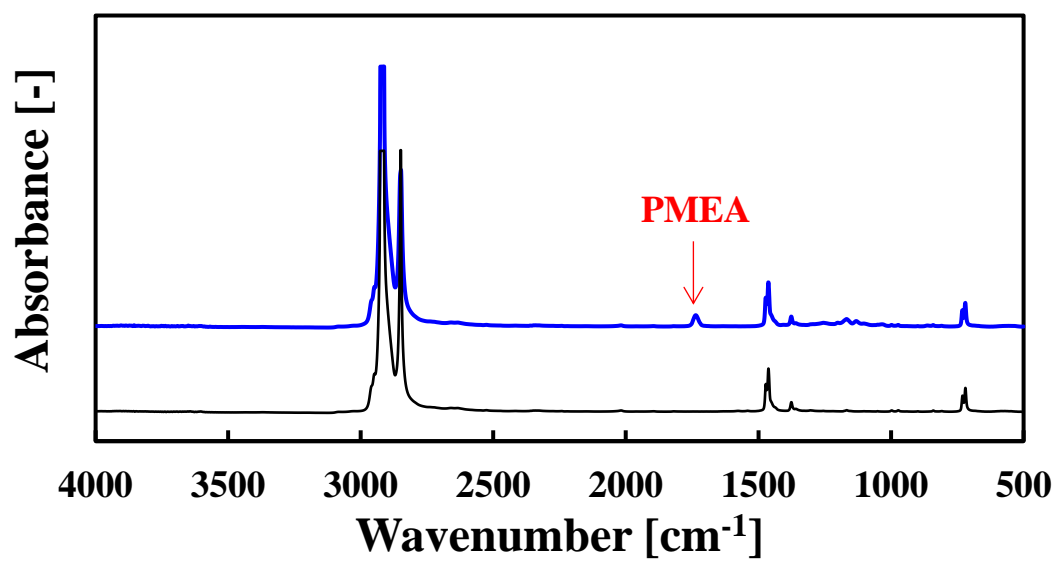

**Figure S1.** FT-IR spectra of unmodified (black) and modified membranes with a grafting amount of 0.12 mg cm<sup>-2</sup> (blue), which were analyzed by the transmission method.
